# Supplementary material
Source: MDPI journal article supplement (https://www.mdpi.com/2411-5142/7/4/77)
Supplement: s1 [file s1]

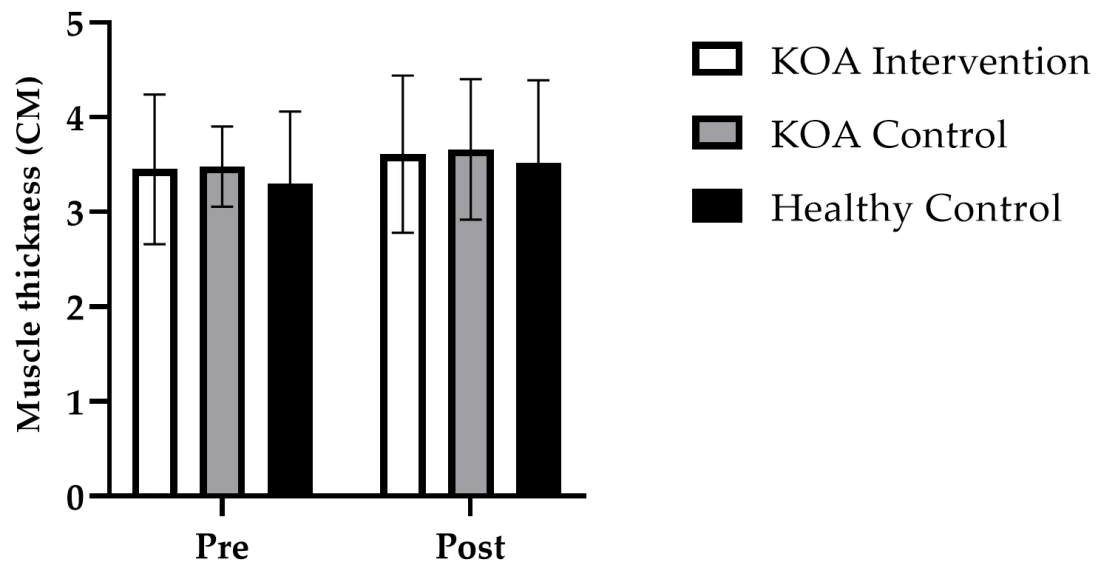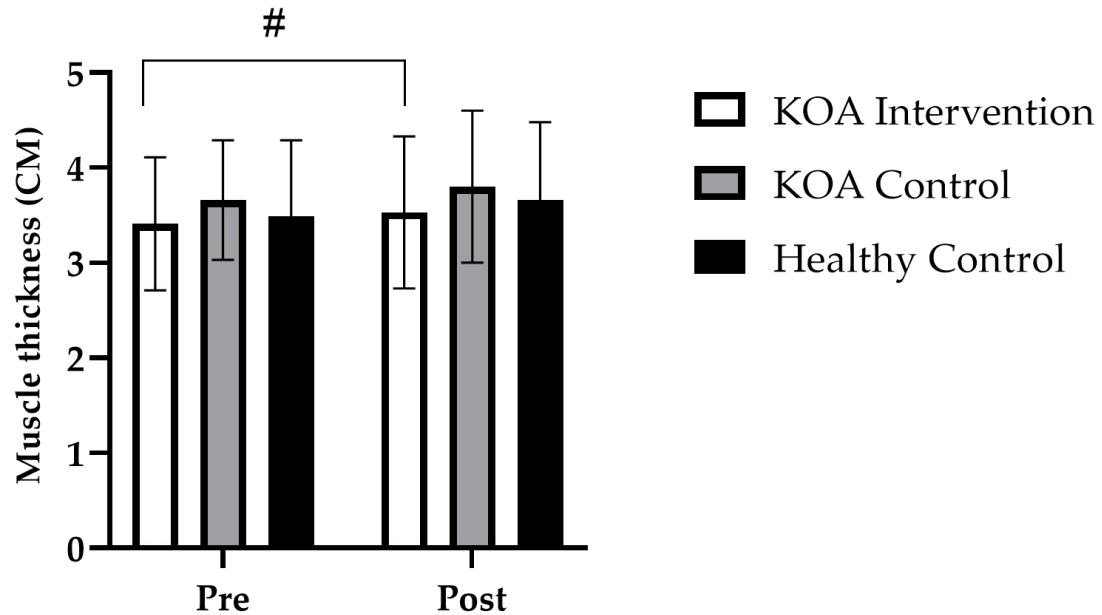

**Figure S1.** Top graph shows muscle thickness of the trained limb, whilst the bottom graph displays muscle thickness of the untrained limb. # Significant difference pre-post in muscle thickness for the untrained limb for the KOA intervention group.
